# Supplementary material for: LGALS3BP is a novel and potential biomarker in clear cell renal cell carcinoma
Source: Aging (Albany NY). 2024 Feb 22;16(4):4033–51. doi: 10.18632/aging.205578 (PMC10929836; doi:10.18632/aging.205578)
Supplement: Supplementary Table 2 [file aging-16-205578-s003.xls]

## Sheet: Table S1
Supplementary Table 2. Related gene list of proliferation, stemness and angiogenesis.
Stem cell gene set	Proliferative genes	angiogenesis genes
DNMT3B	FLVCR2	VEGFA
MCM6	LRRC32	KDR
CDC25A	FLVCR2-AS1	HIF1A
PFAS	VEGFA	FGF2
MCM4	CAPN5	FLT1
XRCC5	IL6	ADGRB1
HAUS6	BTG1	ANGPT1
TET1	IFNG	TEK
IGF2BP1	EPO	THBS1
PLAA	CCL2	ANGPT2
DEPDC1B	CD3G	ENG
TEX10	FGF2	VEGFC
CCDC99	BTG2	ADGRB3
MSH2	TNF	ADGRB2
BUB1B	HFE	PLG
MSH6	MALT1	MMP9
DLGAP5	KDR	MMP2
SKIV2L2	EDN1	AKT1
CENPE	TP53	CXCL8
CHEK2	CCR5	NOS3
SOHLH2	MAPK1	PTGS2
CCNB1	STAT3	TYMP
RRAS2	TFRC	NRP1
PRIM1	ORAI1	HGF
PAICS	FN1	PGF
CCNA2	RELB	SERPINF1
CPSF3	FOXN1	FLT4
NUSAP1	BCL11B	IL6
LIN28B	CCN2	COL18A1
IPO5	TGFB1	CTNNB1
KIF11	PGR	TGFB1
BMPR1A	HFE-AS1	EPO
NDC80	NDP	VASH1
BCAT1	FOS	ISM1
CCNG1	THBS1	VEGFD
ZNF788	STIM1	ITGAV
ASCC3	FZD4	TNF
FANCB	MKI67	DLL4
MCM10	HGF	PDGFRB
HMGA2	PIK3CA	HPSE
SKP2	TOB1	EGFR
TRIM24	IL4	PECAM1
ORC1	JAK3	STAT3
HDAC2	ZAP70	FGF1
HESX1	CTNNB1	TP53
C1orf135	PDS5B	BAIAP2
INHBE	PCNA	CDH5
MIS18A	SERPINE1	MAPK1
DCUN1D5	CSF3	GDF2
POLE2	TGFB2
MRPL3	IL2
CENPH	CDKN2A
MYCN	PDGFD
HAUS1	PPARGC1A
GDF3	PPRC1
TBCE	JAK2
RIOK2	CD3D
BCKDHB	C1QA
RAD1	C1QC
NREP	TIMP2
ADH5	GFAP
PLRG1	C1QB
ROR1	CCL3
RAB3B	MSH3
LOC285431	TSPAN12
DBC1	PRSS23
KIF23	THY1
DIAPH3	IL2RG
GNL2	TIMP1
FGF2	MCM2
TARDBP	CNOT7
NMNAT2	RAG1
ZNF167	IL2RB
KIF20A	PPARGC1B
CENPI	ESR1
DDX1	NDP-AS1
XXYLT1	PTPRC
GPR176	IGF1
FBXO22	FLT4
BBS9	BCL2
C14orf166	LRBA
BOD1	PPARG
CDC123	KRIT1
SNRPD3	VTN
FAM118B	CDKN1B
DPH3	ADA
EIF2B3	TGFB1I1
KDELC1	CCND1
RPF2	SERPINF1
APLP1	GNAQ
DACT1	IL7R
PDHB	C3
C14orf119	ANTXR1
DTD1	CORO1A
SAMM50	SERPINA3
CCL26	RAG2
C4orf52	CD4
CCDC90B	IL10
MED20	ALB
UTP6	CXCL12
RARS2
KIAA0020
ARMCX2
RARS
MTHFD2
DHX15
HTR7
HIST1H4C
MTHFD1L
ARMC9
XPOT
IARS
HDX
ACTRT3
ERCC2
TBC1D16
GARS
KIF7
UBE2K
SLC25A3
ICMT
UGGT2
ATP11C
SLC24A1
EIF2AK4
GPX8
ALX1
OSTC
TRPC4
HAS2
FZD2
TRNT1
MMADHC
SNX8
CDH6
HAT1
SEC11A
DIMT1
TM2D2
FST
GBE1
NA
MLL3
MXI1
FKSG49
FAM185BP
ARRB2
SMARCC2
WASH3P
PILRB
CTSH
SAT1
JUNB
CD53
PECAM1
IL10RA
RCSD1
ARHGDIB
GIMAP5
GIMAP6
HLA-DMB
PTPRC
C10orf128
CMBL
HLA-DRB5
HLA-DPA1
ABCG1
GIMAP7
HLA-DQA1
TSHZ2
RGCC
CCR1
NPR3
RSAD2
GIMAP1
TNFSF10
AFTPH
NA
MALAT1
UBXN2A
PDE4C
GIMAP8
FYB
MS4A7
C5orf56
LOC400931
MLLT6
CTSS
ZBTB20
